# Supplementary material for: A Modified Structured Magnetic Resonance Imaging Reporting for Anal Fistula: A Study onPracticality ,Timeliness and Reliability
Source: Research Square preprint supplement (doi:10.21203/rs.3.rs-7605595/v1), 2025-10-15
Supplement: Supplementary file 1 [file 14c0f0df463665502ecfe74d.pdf]

1. The anal fistula MRI report sentences that rarely convey equivocal terms

|   |   |   |   |   |   |   |   |   |    |
|---|---|---|---|---|---|---|---|---|----|
| 1 | 2 | 3 | 4 | 5 | 6 | 7 | 8 | 9 | 10 |
|---|---|---|---|---|---|---|---|---|----|

2. Upon reviewing the MRI report of the anal fistula, we have acquired a  
  
comprehensive understanding of the necessary imaging data for treating  
  
patients with anal fistulas, obviating the need for further review of the  
  
MRI data.

|   |   |   |   |   |   |   |   |   |    |
|---|---|---|---|---|---|---|---|---|----|
| 1 | 2 | 3 | 4 | 5 | 6 | 7 | 8 | 9 | 10 |
|---|---|---|---|---|---|---|---|---|----|

3. Anal fistula MRI report is helpful in the implementation of anal fistula  
  
surgical treatment。

|   |   |   |   |   |   |   |   |   |    |
|---|---|---|---|---|---|---|---|---|----|
| 1 | 2 | 3 | 4 | 5 | 6 | 7 | 8 | 9 | 10 |
|---|---|---|---|---|---|---|---|---|----|
