# Supplementary figures and images for: A Modified Structured Magnetic Resonance Imaging Reporting for Anal Fistula: A Study onPracticality ,Timeliness and Reliability
Source: Research Square preprint supplement (doi:10.21203/rs.3.rs-7605595/v1), 2025-10-15

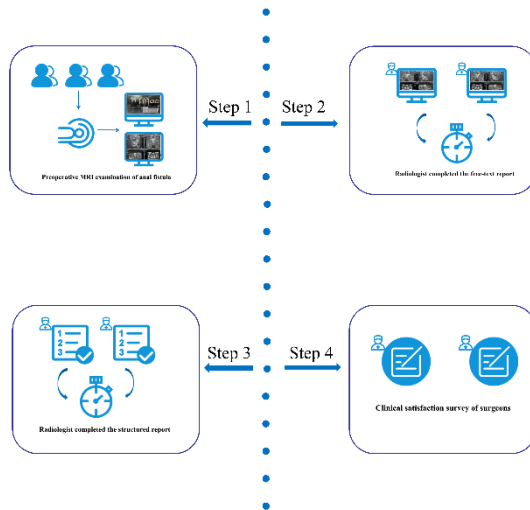

Supplement: Supplementary file 2 [file e62d6fda11fb9cae2c5ddb9b.pdf]
